# Supplementary material
Source: PubMed Central journal article supplement (PMC4702978)
Supplement: pnas.1522860113.sd01.pdf [file pnas.1522860113.sd01.pdf]

**Dataset S1. The results from individual contact efflorescence experiments.**

| Droplet                                             | CN                                              | Trial Number <sup>a</sup>                           | Droplet Number <sup>b</sup> | Outcome <sup>c</sup>               | RH (%)                  |
|-----------------------------------------------------|-------------------------------------------------|-----------------------------------------------------|-----------------------------|------------------------------------|-------------------------|
| (NH <sub>4</sub> ) <sub>2</sub> SO <sub>4(aq)</sub> | (NH <sub>4</sub> ) <sub>2</sub> SO <sub>4</sub> | 1 (1.5 μm CN) <sup>d</sup>                          | 1                           | Single-collision CE                | 78.4±1.0 <sup>e,f</sup> |
|                                                     |                                                 |                                                     | 2                           | Single-collision CE                | 78.7±2.5 <sup>e</sup>   |
|                                                     |                                                 |                                                     | 3                           | Single-collision CE                | 79.3±1.0 <sup>e</sup>   |
|                                                     |                                                 |                                                     | 4                           | Single-collision CE                | 79.2±1.7 <sup>e</sup>   |
|                                                     |                                                 |                                                     | 5                           | Single-collision CE                | 79.0±1.2 <sup>e</sup>   |
|                                                     |                                                 | Average CERH <sup>g</sup>                           |                             | 79±2                               |                         |
| (NH <sub>4</sub> ) <sub>2</sub> SO <sub>4(aq)</sub> | K <sub>2</sub> SO <sub>4</sub>                  | 1                                                   | 1                           | Single-collision CE                | 56.3±3.3 <sup>h</sup>   |
|                                                     |                                                 |                                                     | 2                           | Single-collision CE                | 62.2±2.9                |
|                                                     |                                                 |                                                     | 3                           | Single-collision CE                | 63.6±1.0                |
|                                                     |                                                 |                                                     | 4                           | Single-collision CE                | 65.4±1.0                |
|                                                     |                                                 |                                                     | 5                           | Single-collision CE                | 67.6±1.0                |
|                                                     |                                                 |                                                     | 6                           | Single-collision CE                | 69.6±1.2                |
|                                                     |                                                 |                                                     | 7                           | Single-collision CE                | 77.6±2.6 <sup>e,h</sup> |
|                                                     |                                                 | 2                                                   | 1                           | Single-collision CE                | 77.3±2.3 <sup>e,h</sup> |
|                                                     |                                                 | Average CERH <sup>g</sup>                           |                             | 77±3                               |                         |
|                                                     |                                                 | (NH <sub>4</sub> ) <sub>2</sub> SO <sub>4(aq)</sub> | NaCl                        | 1 (0.5 μm CN) <sup>d</sup>         | 1                       |
| 2                                                   | Collision, no CE                                |                                                     |                             |                                    | 40.3±2.0                |
| 3                                                   | Single-collision CE                             |                                                     |                             |                                    | 37.9±2.8                |
| 2 (1 μm CN) <sup>d</sup>                            | 1                                               |                                                     |                             | Collision, no CE                   | 45.2±1.0                |
|                                                     | 2                                               |                                                     |                             | Collision, no CE                   | 39.7±1.0                |
|                                                     | 3                                               |                                                     |                             | Single-collision CE                | 37.6±1.0                |
| 3                                                   | 1                                               |                                                     |                             | Collision, no CE                   | 44.7±4.2                |
|                                                     | 2                                               |                                                     |                             | Collision, no CE                   | 41.2±2.5                |
|                                                     | 3                                               |                                                     |                             | Homogeneous eff                    | 37.1±1.1                |
|                                                     | 4                                               |                                                     |                             | Single-collision CE                | 38.2±1.0                |
| 4                                                   | 1                                               |                                                     |                             | Collision, no CE                   | 39.5±1.1                |
|                                                     | 2                                               |                                                     |                             | Single-collision CE                | 38.4±1.2                |
|                                                     | Average CERH <sup>g</sup>                       |                                                     |                             |                                    | 38±2                    |
| (NH <sub>4</sub> ) <sub>2</sub> SO <sub>4(aq)</sub> | Na <sub>2</sub> SO <sub>4</sub>                 |                                                     |                             | 1                                  | 1                       |
|                                                     |                                                 | 2                                                   | Collision, no CE            |                                    | 47.3±3.1                |
|                                                     |                                                 | 3                                                   | Single-collision CE         |                                    | 43.5±2.2                |
|                                                     |                                                 | 2                                                   | 1                           | Collision, no CE                   | 49.1±1.0                |
|                                                     |                                                 |                                                     | 2                           | Collision, no CE                   | 45.3±2.0                |
|                                                     |                                                 |                                                     | 3                           | Single-collision CE                | 42.3±2.9                |
|                                                     |                                                 | 3                                                   | 1                           | Multiple-collision CE              | 44.8±2.2                |
|                                                     |                                                 |                                                     | 2                           | Single-collision CE                | 43.0±1.9                |
|                                                     |                                                 | Average CERH <sup>g</sup>                           |                             | 43±3                               |                         |
|                                                     |                                                 | (NH <sub>4</sub> ) <sub>2</sub> SO <sub>4(aq)</sub> | NaBr                        | 1                                  | 1                       |
| 2                                                   | Collision, no CE                                |                                                     |                             |                                    | 39.9±1.0                |
| 3                                                   | Homogeneous eff                                 |                                                     |                             |                                    | 36.6±1.0                |
| 4                                                   | Single-collision CE                             |                                                     |                             |                                    | 37.4±0.6                |
| 2                                                   | 1                                               |                                                     |                             | Multiple-collision CE <sup>e</sup> | 38.2±1.0                |
|                                                     | 2                                               |                                                     |                             | Homogeneous eff                    | 36.7±1.0                |
|                                                     | 3                                               |                                                     |                             | Single-collision CE                | 36.9±1.0                |
| 3                                                   | 1                                               |                                                     |                             | Multiple-collision CE              | 37.7±1.0                |
|                                                     | 2                                               |                                                     |                             | Homogeneous eff                    | 36.4±1.0                |
|                                                     | 3                                               |                                                     |                             | Homogeneous eff                    | 37.2±1.0                |
|                                                     | 4                                               |                                                     |                             | Single-collision CE                | 37.0±1.0                |

|                                                     |                                 |                                     |                                 |                            |                 |                       |          |
|-----------------------------------------------------|---------------------------------|-------------------------------------|---------------------------------|----------------------------|-----------------|-----------------------|----------|
|                                                     |                                 | <b>Average CERH<sup>g</sup></b>     |                                 |                            | <b>37±1</b>     |                       |          |
| (NH <sub>4</sub> ) <sub>2</sub> SO <sub>4(aq)</sub> | KCl                             | 1                                   | 1                               | Collision, no CE           | 54.3±2.0        |                       |          |
|                                                     |                                 |                                     | 2                               | Collision, no CE           | 46.3±3.0        |                       |          |
|                                                     |                                 |                                     | <b>3</b>                        | <b>Single-collision CE</b> | <b>43.1±1.8</b> |                       |          |
|                                                     |                                 | 2                                   | 1                               | Collision, no CE           | 51.7±1.0        |                       |          |
|                                                     |                                 |                                     | 2                               | Multiple-collision CE      | 45.2±1.0        |                       |          |
|                                                     |                                 |                                     | <b>3</b>                        | <b>Single-collision CE</b> | <b>42.1±1.6</b> |                       |          |
|                                                     |                                 | 3                                   | 1                               | Multiple-collision CE      | 43.5±1.3        |                       |          |
|                                                     |                                 |                                     | 2                               | <b>Single-collision CE</b> | <b>41.6±1.0</b> |                       |          |
|                                                     |                                 |                                     | <b>Average CERH<sup>g</sup></b> |                            | <b>42±2</b>     |                       |          |
| NH <sub>4</sub> NO <sub>3(aq)</sub>                 | K <sub>2</sub> SO <sub>4</sub>  | 1                                   | 1                               | Single-collision CE        | 46.4±1.3        |                       |          |
|                                                     |                                 |                                     | 2                               | Multiple-collision CE (9)  | 52.2±1.0        |                       |          |
|                                                     |                                 |                                     | <b>3</b>                        | <b>Single-collision CE</b> | <b>49.8±1.5</b> |                       |          |
|                                                     |                                 | 2                                   | 1                               | Multiple-collision CE (26) | 52.7±1.2        |                       |          |
|                                                     |                                 |                                     | 2                               | Multiple-collision CE (2)  | 49.6±1.0        |                       |          |
|                                                     |                                 |                                     | <b>3</b>                        | <b>Single-collision CE</b> | <b>49.1±1.2</b> |                       |          |
|                                                     |                                 | 3                                   | 1                               | Multiple-collision CE (15) | 51.4±1.0        |                       |          |
|                                                     |                                 |                                     | 2                               | Single-collision CE        | 48.3±1.2        |                       |          |
|                                                     |                                 |                                     | <b>3</b>                        | <b>Single-collision CE</b> | <b>49.9±1.3</b> |                       |          |
|                                                     |                                 | 4                                   | 1                               | Multiple-collision CE (4)  | 50.6±1.2        |                       |          |
|                                                     |                                 |                                     | 2                               | <b>Single-collision CE</b> | <b>49.5±1.1</b> |                       |          |
|                                                     |                                 |                                     | <b>Average CERH<sup>g</sup></b> |                            | <b>50±2</b>     |                       |          |
|                                                     |                                 | NH <sub>4</sub> NO <sub>3(aq)</sub> | NaCl                            | 1                          | 1               | Collision, no CE      | 56.5±2.3 |
|                                                     |                                 |                                     |                                 |                            | 2               | Collision, no CE      | 51.6±1.9 |
|                                                     |                                 |                                     |                                 |                            | 3               | Multiple-collision CE | 49.5±1.5 |
| 4                                                   | Single-collision CE             |                                     |                                 |                            | 39.9±3.5        |                       |          |
| <b>5</b>                                            | <b>Single-collision CE</b>      |                                     |                                 |                            | <b>45.4±0.5</b> |                       |          |
| 2                                                   | 1                               |                                     |                                 | Collision, no CE           | 51.4±1.6        |                       |          |
|                                                     | 2                               |                                     |                                 | Multiple-collision CE      | 48.5±0.5        |                       |          |
|                                                     | <b>3</b>                        |                                     |                                 | <b>Single-collision CE</b> | <b>46.4±1.6</b> |                       |          |
| 3                                                   | 1                               |                                     |                                 | Collision, no CE           | 50.6±0.5        |                       |          |
|                                                     | <b>2</b>                        |                                     |                                 | <b>Single-collision CE</b> | <b>46.7±0.5</b> |                       |          |
| <b>Average CERH<sup>g</sup></b>                     |                                 |                                     |                                 | <b>46±2</b>                |                 |                       |          |
| NH <sub>4</sub> NO <sub>3(aq)</sub>                 | Na <sub>2</sub> SO <sub>4</sub> |                                     |                                 | 1                          | 1               | Collision, no CE      | 39.4±1.1 |
|                                                     |                                 | 2                                   | Collision, no CE                |                            | 26.9±1.1        |                       |          |
|                                                     |                                 | 3                                   | Multiple-collision CE (4)       |                            | 21.6±1.2        |                       |          |
|                                                     |                                 | <b>4</b>                            | <b>Single-collision CE</b>      |                            | <b>19.6±1.0</b> |                       |          |
|                                                     |                                 | 2                                   | 1                               | Multiple-collision CE (11) | 24.2±0.5        |                       |          |
|                                                     |                                 |                                     | 2                               | Multiple-collision CE (5)  | 22.8±1.3        |                       |          |
|                                                     |                                 |                                     | 3                               | Multiple-collision CE (3)  | 21.2±2.0        |                       |          |
|                                                     |                                 |                                     | <b>4</b>                        | <b>Single-collision CE</b> | <b>20.6±2.5</b> |                       |          |
|                                                     |                                 | 3                                   | 1                               | Multiple-collision CE (43) | 25.6±1.1        |                       |          |
|                                                     |                                 |                                     | 2                               | Multiple-collision CE (8)  | 23.5±2.0        |                       |          |
|                                                     |                                 |                                     | 3                               | Multiple-collision CE (2)  | 21.5±1.0        |                       |          |
|                                                     |                                 |                                     | <b>4</b>                        | <b>Single-collision CE</b> | <b>20.1±1.6</b> |                       |          |
|                                                     |                                 | 4                                   | 1                               | Multiple-collision CE (6)  | 22.9±1.7        |                       |          |
|                                                     |                                 |                                     | 2                               | Multiple-collision CE (2)  | 22.6±0.8        |                       |          |
|                                                     |                                 |                                     | 3                               | Multiple-collision CE (3)  | 22.0±1.0        |                       |          |
|                                                     |                                 |                                     | <b>4</b>                        | <b>Single-collision CE</b> | <b>21.0±1.0</b> |                       |          |
|                                                     |                                 | <b>Average CERH<sup>g</sup></b>     |                                 | <b>20±2</b>                |                 |                       |          |

|                                     |                                                 |          |                                 |                            |                       |
|-------------------------------------|-------------------------------------------------|----------|---------------------------------|----------------------------|-----------------------|
| NH <sub>4</sub> NO <sub>3(aq)</sub> | NaBr                                            | 1        | 1                               | Collision, no CE           | 50.6±2.9              |
|                                     |                                                 |          | 2                               | Single-collision CE        | 42.7±2.6              |
|                                     |                                                 |          | <b>3</b>                        | <b>Single-collision CE</b> | <b>44.9±1.8</b>       |
|                                     |                                                 | 2        | 1                               | Multiple CE                | 48.4±1.0              |
|                                     |                                                 |          | <b>2</b>                        | <b>Single-collision CE</b> | <b>44.8±2.0</b>       |
|                                     |                                                 | 3        | 1                               | Multiple-collision CE      | 47.2±1.5              |
|                                     |                                                 |          | 2                               | Multiple-collision CE      | 45.5±1.5              |
|                                     |                                                 |          | <b>3</b>                        | <b>Single-collision CE</b> | <b>44.9±1.7</b>       |
|                                     |                                                 |          | <b>Average CERH<sup>g</sup></b> |                            | <b>45±2</b>           |
| NH <sub>4</sub> NO <sub>3(aq)</sub> | KCl                                             | 1        | 1                               | Collision, no CE           | 55.3±3.8              |
|                                     |                                                 |          | 2                               | Collision, no CE           | 28.0±2.6              |
|                                     |                                                 |          | <b>3</b>                        | <b>Single-collision CE</b> | <b>21.4±3.0</b>       |
|                                     |                                                 | 2        | 1                               | Collision, no CE           | 30.4±1.5              |
|                                     |                                                 |          | 2                               | Multiple-collision CE      | 25.7±2.6              |
|                                     |                                                 |          | <b>3</b>                        | <b>Single-collision CE</b> | <b>21.2±1.0</b>       |
|                                     |                                                 | 3        | 1                               | Collision, no CE           | 24.3±2.7              |
|                                     |                                                 |          | <b>2</b>                        | <b>Single-collision CE</b> | <b>21.0±2.9</b>       |
|                                     |                                                 |          | <b>Average CERH<sup>g</sup></b> |                            | <b>21±3</b>           |
| NH <sub>4</sub> NO <sub>3(aq)</sub> | (NH <sub>4</sub> ) <sub>2</sub> SO <sub>4</sub> | 1        | 1                               | Collision, no CE           | 53.4±1.5              |
|                                     |                                                 |          | <b>2</b>                        | <b>Single-collision CE</b> | <b>45.9±3.0</b>       |
|                                     |                                                 | 2        | 1                               | Collision, no CE           | 51.7±1.6              |
|                                     |                                                 |          | <b>2</b>                        | <b>Single-collision CE</b> | <b>47.2±1.4</b>       |
|                                     |                                                 | 3        | 1                               | Multiple-collision CE      | 49.2±1.0              |
|                                     |                                                 |          | <b>2</b>                        | <b>Single-collision CE</b> | <b>46.5±1.0</b>       |
|                                     |                                                 |          | <b>Average CERH<sup>g</sup></b> |                            | <b>47±3</b>           |
| NH <sub>4</sub> NO <sub>3(aq)</sub> | NH <sub>4</sub> NO <sub>3</sub> -illite         | 1        | 1                               | Single-collision CE        | 57.5±2.5              |
|                                     |                                                 |          | 2                               | Single-collision CE        | 57.8±1.0              |
|                                     |                                                 |          | 3                               | Single-collision CE        | 57.6±1.0              |
|                                     |                                                 |          | <b>4</b>                        | <b>Single-collision CE</b> | <b>58.8±1.0</b>       |
|                                     |                                                 | 2        | 1                               | Collision, no CE           | 60.6±1.4 <sup>i</sup> |
|                                     |                                                 |          | <b>2</b>                        | <b>Single-collision CE</b> | <b>59.4±1.7</b>       |
|                                     |                                                 | <b>3</b> | <b>1</b>                        | <b>Single-collision CE</b> | <b>58.7±1.4</b>       |
|                                     |                                                 |          | <b>Average CERH<sup>g</sup></b> |                            | <b>59±2</b>           |
| NaCl <sub>(aq)</sub>                | K <sub>2</sub> SO <sub>4</sub>                  | 1        | 1                               | Collision, no CE           | 53.8±2.4              |
|                                     |                                                 |          | <b>2</b>                        | <b>Single-collision CE</b> | <b>48.0±3.0</b>       |
|                                     |                                                 | 2        | 1                               | Collision, no CE           | 51.3±2.8              |
|                                     |                                                 |          | <b>2</b>                        | <b>Single-collision CE</b> | <b>47.7±2.7</b>       |
|                                     |                                                 | 3        | 1                               | Collision, no CE           | 52.9±2.5              |
|                                     |                                                 |          | 2                               | Multiple-collision CE      | 50.5±1.2              |
|                                     |                                                 |          | <b>3</b>                        | <b>Single-collision CE</b> | <b>48.5±2.0</b>       |
|                                     |                                                 |          | <b>Average CERH<sup>g</sup></b> |                            | <b>48±3</b>           |
| NaCl <sub>(aq)</sub>                | Na <sub>2</sub> SO <sub>4</sub>                 | 1        | 1                               | Collision, no CE           | 57.8±1.0              |
|                                     |                                                 |          | 2                               | Collision, no CE           | 53.4±1.0              |
|                                     |                                                 |          | 3                               | Single-collision CE        | 49.9±1.2              |
|                                     |                                                 |          | <b>4</b>                        | <b>Single-collision CE</b> | <b>51.6±1.2</b>       |
|                                     |                                                 | 2        | 1                               | Collision, no CE           | 54.6±1.0              |
|                                     |                                                 |          | 2                               | Multiple-collision CE      | 52.4±1.0              |
|                                     |                                                 |          | <b>3</b>                        | <b>Single-collision CE</b> | <b>51.1±1.3</b>       |
|                                     |                                                 | 3        | 1                               | Multiple-collision CE      | 53.5±1.0              |
|                                     |                                                 |          | 2                               | Multiple-collision CE      | 52.5±1.0              |

|                      |                                                 |                                 |          |                            |                       |
|----------------------|-------------------------------------------------|---------------------------------|----------|----------------------------|-----------------------|
|                      |                                                 |                                 | <b>3</b> | <b>Single-collision CE</b> | <b>52.0±1.2</b>       |
|                      |                                                 | 4                               | 1        | Multiple-collision CE      | 53.6±1.4              |
|                      |                                                 |                                 | <b>2</b> | <b>Single-collision CE</b> | <b>52.1±1.0</b>       |
|                      |                                                 | <b>Average CERH<sup>g</sup></b> |          |                            | <b>52±2</b>           |
| NaCl <sub>(aq)</sub> | NaBr                                            | 1                               | 1        | Single-collision CE        | 45.8±2.9              |
|                      |                                                 |                                 | <b>2</b> | <b>Single-collision CE</b> | <b>49.7±2.0</b>       |
|                      |                                                 | 2                               | 1        | Multiple-collision CE      | 51.2±1.6              |
|                      |                                                 |                                 | <b>2</b> | <b>Single-collision CE</b> | <b>50.4±1.4</b>       |
|                      |                                                 | 3                               | 1        | Multiple-collision CE      | 52.9±1.5              |
|                      |                                                 |                                 | <b>2</b> | <b>Single-collision CE</b> | <b>51.3±1.3</b>       |
|                      |                                                 | 4                               | 1        | Collision, no CE           | 53.0±2.1              |
|                      |                                                 |                                 | 2        | Multiple-collision CE      | 51.9±1.8              |
|                      |                                                 |                                 | 3        | Multiple-collision CE      | 50.9±1.8              |
|                      |                                                 |                                 | <b>4</b> | <b>Single-collision CE</b> | <b>49.3±2.0</b>       |
|                      |                                                 | 5                               | 1        | Collision, no CE           | 50.3±2.0              |
|                      |                                                 |                                 | 2        | Multiple-collision CE      | 49.5±2.1              |
|                      |                                                 |                                 | <b>3</b> | <b>Single-collision CE</b> | <b>48.6±2.1</b>       |
|                      |                                                 | <b>Average CERH<sup>g</sup></b> |          |                            | <b>50±3</b>           |
| NaCl <sub>(aq)</sub> | KCl                                             | 1                               | 1        | Collision, no CE           | 73.9±1.0              |
|                      |                                                 |                                 | 2        | Single-collision CE        | 60.7±1.8              |
|                      |                                                 |                                 | <b>3</b> | <b>Single-collision CE</b> | <b>63.8±2.0</b>       |
|                      |                                                 | 2                               | 1        | Collision, no CE           | 68.5±3.2              |
|                      |                                                 |                                 | 2        | Collision, no CE           | 65.6±2.8              |
|                      |                                                 |                                 | <b>3</b> | <b>Single-collision CE</b> | <b>63.7±3.0</b>       |
|                      |                                                 | 3                               | 1        | Collision, no CE           | 65.8±1.9              |
|                      |                                                 |                                 | 2        | Single-collision CE        | 61.5±1.0              |
|                      |                                                 |                                 | <b>3</b> | <b>Single-collision CE</b> | <b>64.1±1.2</b>       |
|                      |                                                 | <b>Average CERH<sup>g</sup></b> |          |                            | <b>64±3</b>           |
| NaCl <sub>(aq)</sub> | (NH <sub>4</sub> ) <sub>2</sub> SO <sub>4</sub> | 1                               | 1        | Collision, no CE           | 51.4±2.3              |
|                      |                                                 |                                 | 2        | Multiple-collision CE      | 48.5±2.1              |
|                      |                                                 |                                 | <b>3</b> | <b>Single-collision CE</b> | <b>47.1±1.9</b>       |
|                      |                                                 | 2                               | 1        | Collision, no CE           | 50.5±1.0              |
|                      |                                                 |                                 | 2        | Multiple-collision CE      | 48.1±1.0              |
|                      |                                                 |                                 | <b>3</b> | <b>Single-collision CE</b> | <b>46.8±1.0</b>       |
|                      |                                                 | 3                               | 1        | Collision, no CE           | 49.7±1.0              |
|                      |                                                 |                                 | <b>2</b> | <b>Single-collision CE</b> | <b>47.7±1.0</b>       |
|                      |                                                 | 4                               | 1        | Multiple-collision CE      | 50.2±1.0              |
|                      |                                                 |                                 | 2        | Multiple-collision CE      | 48.4±1.0              |
|                      |                                                 |                                 | <b>3</b> | <b>Single-collision CE</b> | <b>47.2±1.0</b>       |
|                      |                                                 | <b>Average CERH<sup>g</sup></b> |          |                            | <b>47±2</b>           |
| NaCl <sub>(aq)</sub> | NaCl                                            | 1                               | 1        | Single-collision CE        | 59.3±4.4              |
|                      |                                                 |                                 | 2        | Single-collision CE        | 69.7±3.1              |
|                      |                                                 |                                 | 3        | Single-collision CE        | 71.3±2.9              |
|                      |                                                 |                                 | <b>4</b> | <b>Single-collision CE</b> | <b>74.1±2.6</b>       |
|                      |                                                 | 2                               | 1        | Collision, no CE           | 74.8±2.5 <sup>i</sup> |
|                      |                                                 |                                 | <b>2</b> | <b>Single-collision CE</b> | <b>73.8±1.0</b>       |
|                      |                                                 | 3                               | <b>1</b> | <b>Single-collision CE</b> | <b>73.6±1.0</b>       |
|                      |                                                 | <b>Average CERH<sup>g</sup></b> |          |                            | <b>74±2</b>           |

<sup>g</sup>Each **Trial** represents a series of individual experiments at varying ambient RH. The ambient RH was varied (by increasing or decreasing the RH) until the CERH was determined for that trial. (Recall, the CERH is the *maximum* RH at which efflorescence was induced upon a single collision.) A new trial was initiated by raising the ambient RH and repeating the process of varying ambient RH.

<sup>b</sup>Each individual experiment within a Trial was performed by trapping a fresh **Droplet** once the ambient RH was set.

<sup>c</sup>The possible outcomes for each experiment (i.e., each Droplet) were **Single-collision CE**, in which contact efflorescence was observed without any previous collisions; **Multiple-collision CE**, in which contact efflorescence was observed but one or more collisions were also observed prior to the collision that induced efflorescence; **Collision, no CE**, in which a CN-droplet collision was observed without efflorescence (note that in these instances, contact efflorescence may still be possible upon more collisions); and **Homogeneous eff**, in which efflorescence was not coincident with a collision and thus assumed to be a result of homogeneous nucleation of efflorescence. Post processing of recorded images was necessary to distinguish possible outcomes (*see main article, Materials and Methods - Monitoring Collisions*). For several instances of Multiple-collision CE, the total number of CN-droplet collisions preceding the one that induced efflorescence were determined from image post-processing and these values are given in parentheses.

<sup>d</sup>Diameter of CN size selected using a differential mobility analyzer (DMA).

<sup>e</sup>Value originally reported by Davis et al. (2015) Long working-distance optical trap for in situ analysis of contact-induced phase transformations. *Anal Chem* 87(12):6186-6194.<sup>12</sup> See reference for experiments performed at lower RH.

<sup>f</sup>The maximum achievable RH was experimentally limited while flowing CN (*see main article, Materials and Methods – RH Control and Measurement*).

<sup>g</sup>The Average CERH (plus/minus one standard deviation) was calculated from the highest RH values where Single-collision CE was observed during a Trial. The values used to calculate the average are highlighted in bold font.

<sup>h</sup>It was not initially anticipated that the  $\text{K}_2\text{SO}_{4(\text{CN})}$ - $(\text{NH}_4)_2\text{SO}_{4(\text{aq})}$  CERH would be as high as 77% RH. Thus, the initial trial began at a low RH (56%) and the CERH was determined by progressively increasing the RH. The two highest values were used to calculate the average CERH. No attempts were made to observe  $\text{K}_2\text{SO}_{4(\text{CN})}$ - $(\text{NH}_4)_2\text{SO}_{4(\text{aq})}$  contact efflorescence at a higher RH due to the experimental difficulty of increasing the RH further (*see main article, Materials and Methods – RH Control and Measurement*) and due to the fact that the observed CERH is just slightly below the thermodynamic limit for  $(\text{NH}_4)_2\text{SO}_{4(\text{aq})}$  efflorescence (80%, i.e., the  $(\text{NH}_4)_2\text{SO}_4$  DRH).

<sup>i</sup>CN likely deliquesced in gas flow prior to CN-droplet collision.
